# Supplementary material for: Engineered RNA biosensors enable ultrasensitive SARS-CoV-2 detection in a simple color and luminescence assay
Source: bioRxiv or medRxiv preprint supplement (doi:10.1101/2021.01.08.21249426), 2021-04-16

Figure S1

A

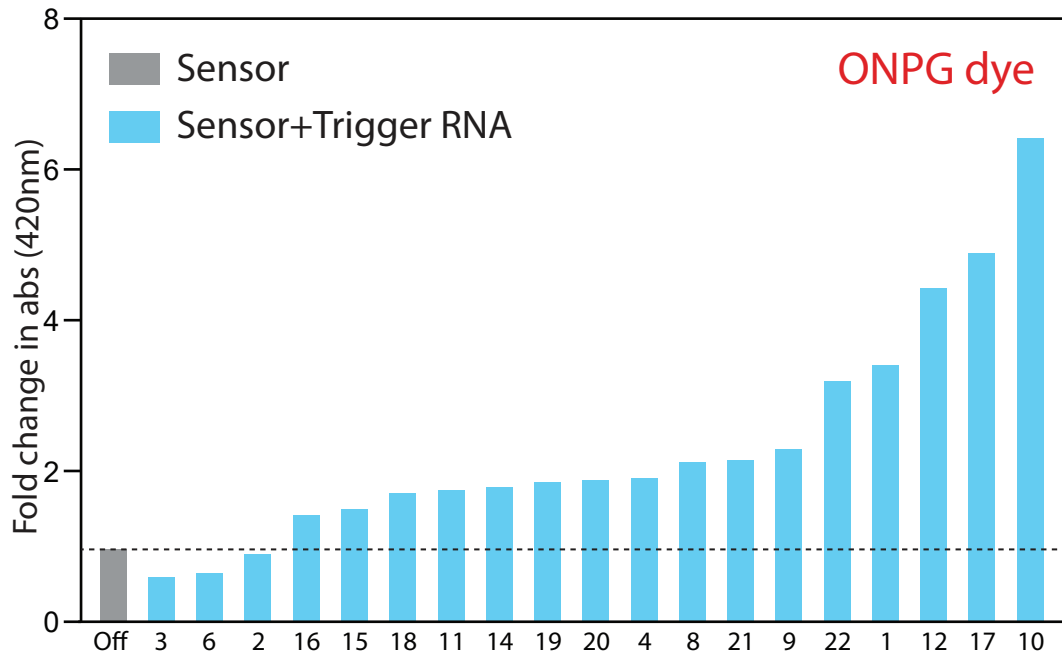

B

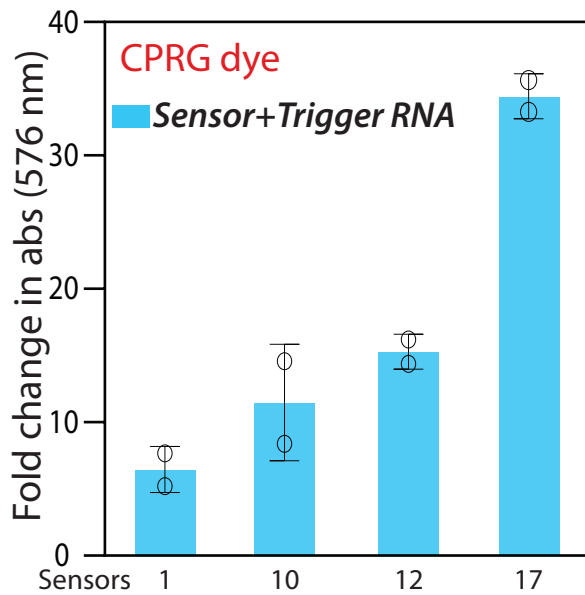

Figure S2

**A Phase 1: Long T7 containing primer pairs**

**Phase 1: Short T7 containing primer pairs**

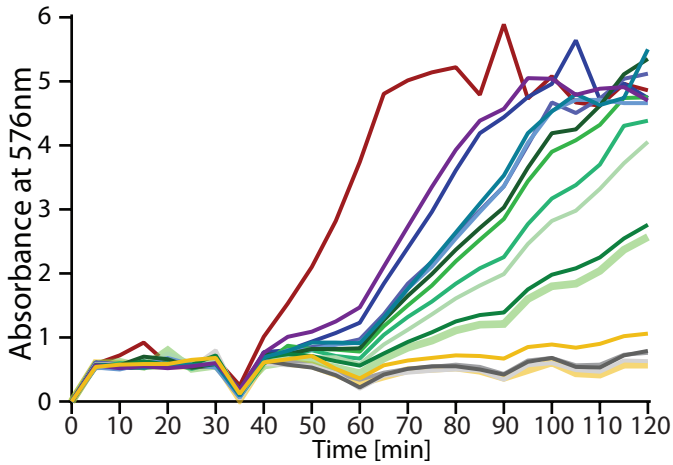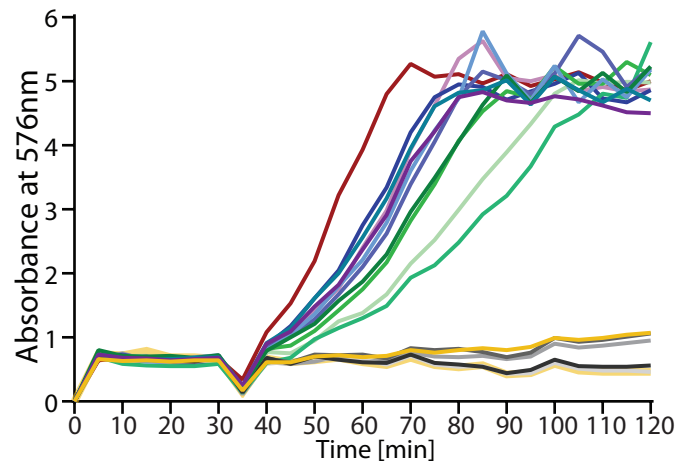

**Primer pairs selected for Phase 2**

**Primer pairs rejected from Phase 1**

**Primer pairs selected for Phase 2**

**Primer pairs rejected from Phase 1**

- L01
- L02
- L05
- L07
- L12
- L14

- L03
- L04
- L06
- L08
- L09
- L10
- L11
- L13

- Off state
- No Primer Control
- Trigger\_12

- S01
- S02
- S05
- S07
- S12
- S14

- S03
- S04
- S06
- S08
- S09
- S10
- S11
- S13

**B Phase 2: Best primer pairs**

**Primer pairs filtered out of Phase 2**

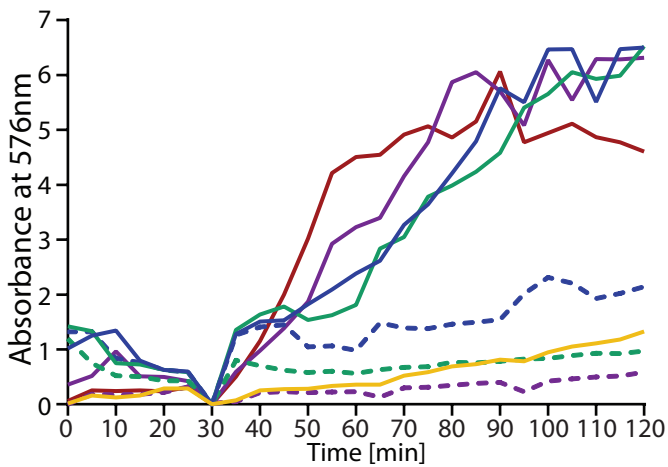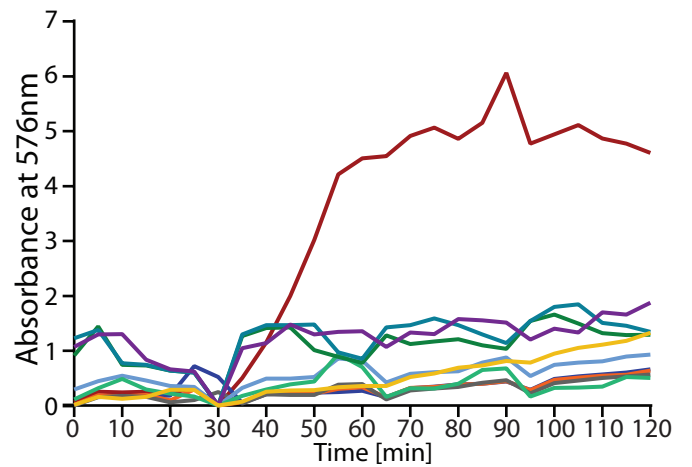

- S01
- S01\_NTC
- L01
- L01\_NTC
- L11
- L11\_NTC
- Trigger 12
- Off state

- L02
- L05
- L12
- S02
- S05
- S07
- S12
- S14

Figure S3

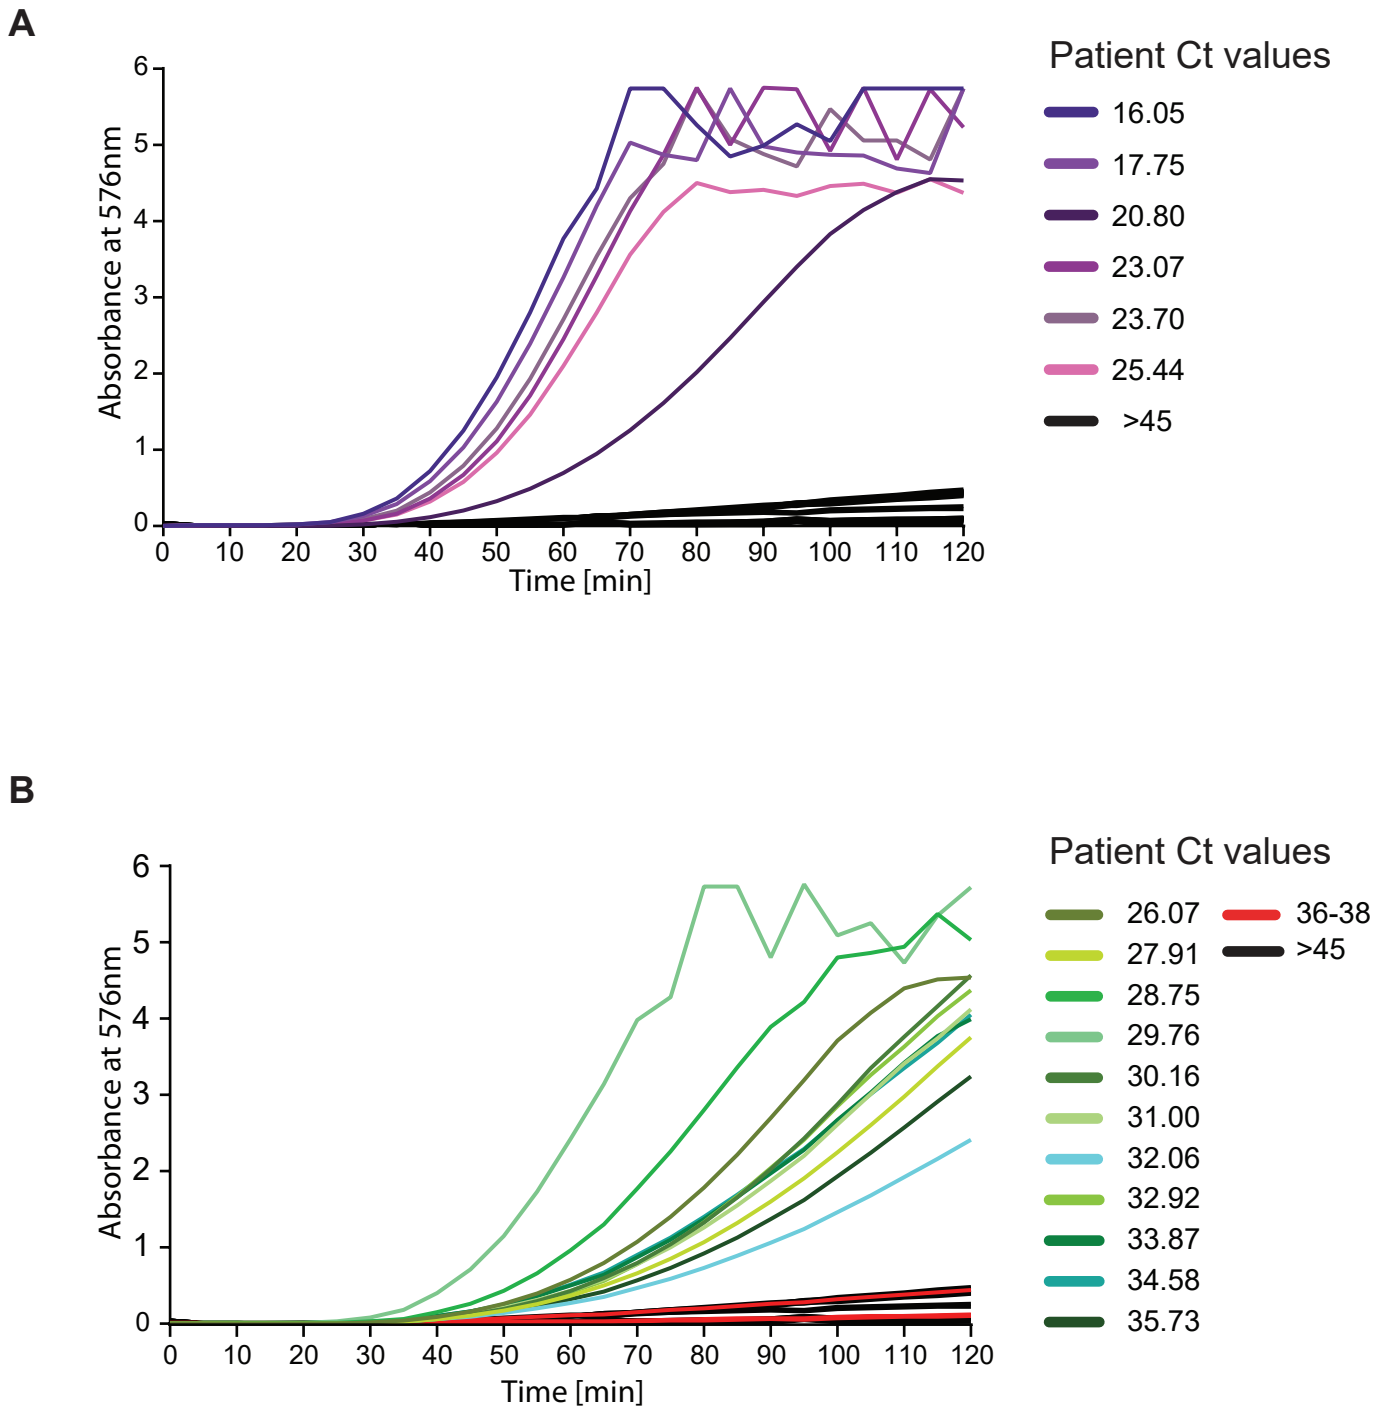

Figure S4

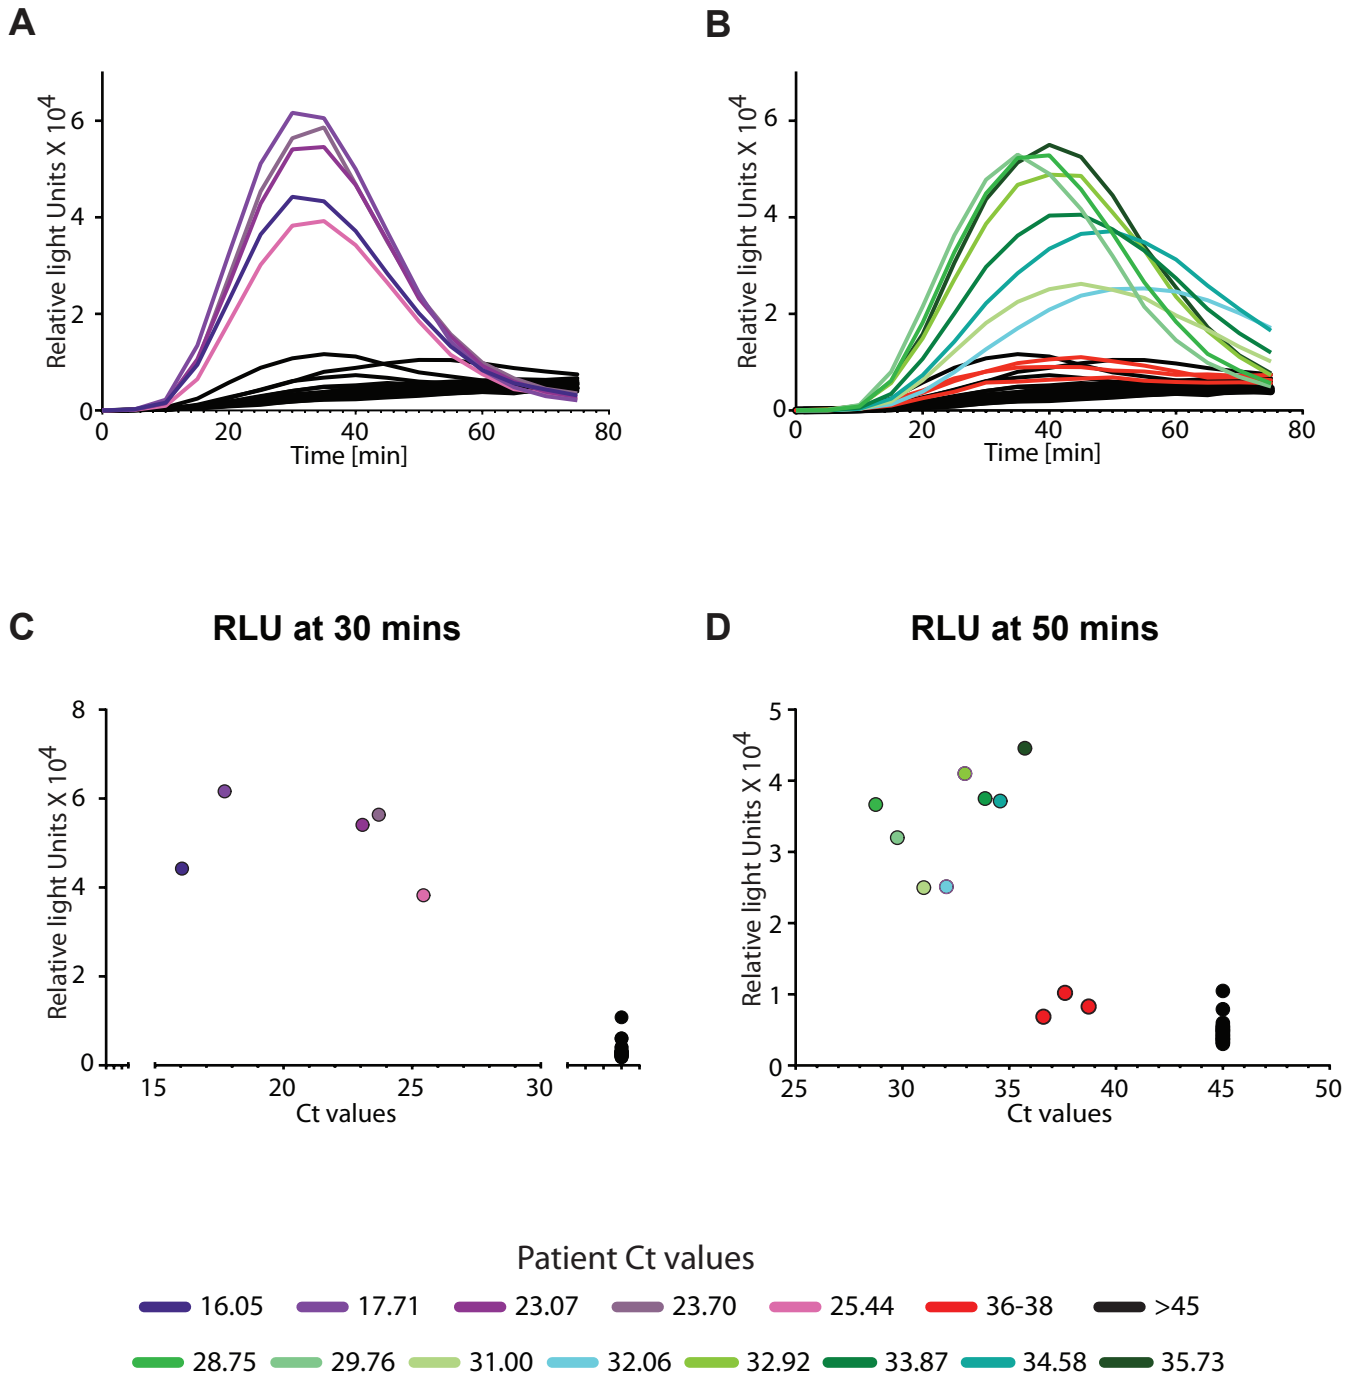

**Figure S5**

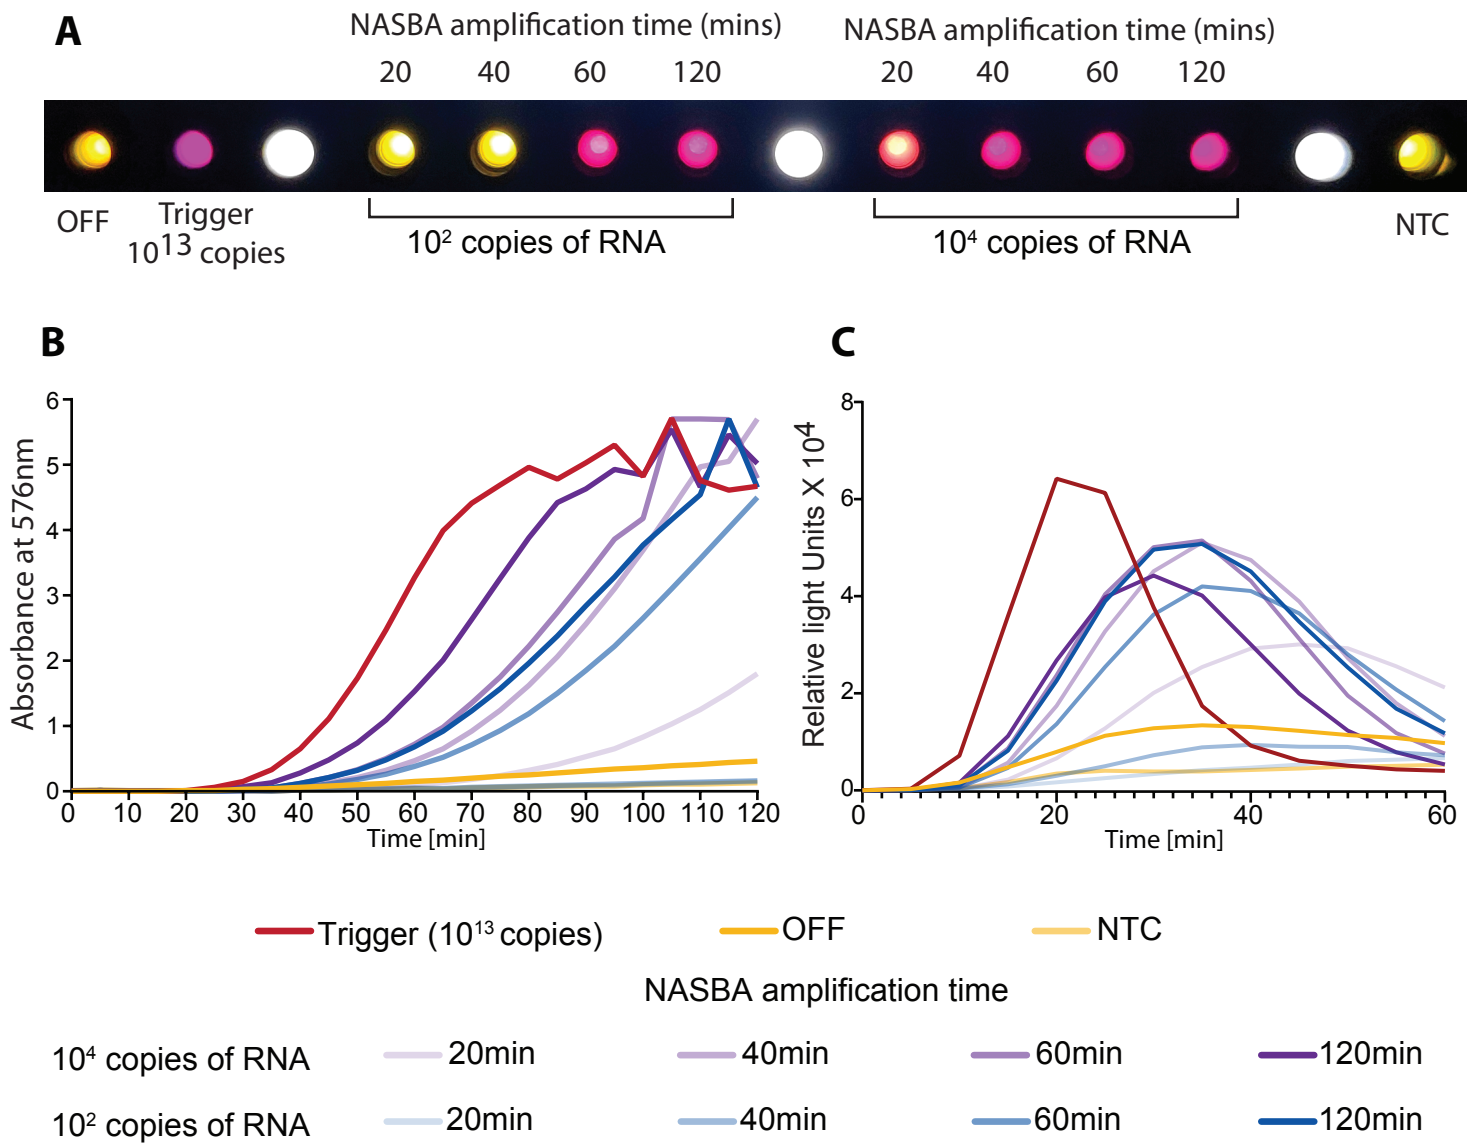

Supplement: Supplementary file [file media-1.pdf]
